# Supplementary material for: Conjugated Linoleic Acid–Carboxymethyl Chitosan Polymeric Micelles to Improve the Solubility and Oral Bioavailability of Paclitaxel
Source: MDPI journal article supplement (doi:10.3390/pharmaceutics16030342), 2024-02-28
Supplement: s1 [file s1]

## **Conjugated Linoleic Acid-Carboxymethyl Chitosan Polymeric Micelles to Improve the Solubility and Oral Bioavailability of Paclitaxel**

Iqra Mubeen <sup>1</sup>, Ghulam Abbas <sup>1,\*</sup>, Shahid Shah <sup>2</sup>, Abdullah A Assiri <sup>3</sup>

<sup>1</sup>Department of Pharmaceutics, Faculty of Pharmaceutical Sciences, Government College University Faisalabad, Pakistan

<sup>2</sup>Department of Pharmacy Practice, Faculty of Pharmaceutical Sciences, Government College University Faisalabad, Pakistan

<sup>3</sup>Department of Clinical Pharmacy, College of Pharmacy, King Khalid University, Abha, Saudi Arabia

**\*Author for Correspondence**

\*ghulamabbas@gcuf.edu.pk

### **1.1. <sup>1</sup>H-NMR of LA, CMCS and LA-CMCS conjugate**

#### **LA**

[<sup>1</sup>H-NMR,  $\delta$  5.46 (dtd, 1H), 5.39 – 5.30 (m, 1H), 2.58 (tp, 1H), 2.21 (t, 1H), 2.04 (tdd, 2H), 1.48 (p, 1H), 1.39 – 1.31 (m, 1H), 1.31 – 1.26 (m, 4H), 1.26 – 1.20 (m, 2H), 0.92 – 0.85 (m, 1H)].

#### **CMCS**

[<sup>1</sup>H-NMR,  $\delta$  4.63 (dq, 1H), 4.33 (d, 1H), 4.15 (s, 2H), 3.94 (qq, 1H), 3.77 (qq, 1H), 3.73 – 3.62 (m, 2H), 3.35 (d, 3H), 3.19 (t, 1H), 3.15 – 3.03 (m, 2H), 1.87 (h, 1H), 1.03 (dt, 3H)].

#### **LA-CMCS conjugate**

[<sup>1</sup>H-NMR,  $\delta$  7.35 (d, 1H), 5.54 – 5.45 (m, 2H), 5.39 – 5.30 (m, 2H), 4.77 (dq, 1H), 4.67 (d, 1H), 4.19 – 4.07 (m, 3H), 4.07 – 4.00 (m, 1H), 4.00 – 3.96 (m, 1H), 3.67 (d, 2H), 3.55 (dt, 1H), 3.47 (d, 3H), 2.52 (tdq, 2H), 2.18 (td, 2H), 2.04 (tdp, 4H), 1.94 (h, 1H), 1.51 (pd, 2H), 1.39 – 1.31 (m, 3H), 1.31 – 1.25 (m, 11H), 1.25 – 1.21 (m, 1H), 1.00 (dt, 3H), 0.94 – 0.84 (m, 3H)].



1.2. Particle size and zeta potential analysis of LA-CMCS2 micelles

Results

|                        | Size (d.nm):  | % Intensity: | St Dev (d.n... |
|------------------------|---------------|--------------|----------------|
| Z-Average (d.nm): 93.0 | Peak 1: 93.0  | 100.0        | 19.85          |
| Pdl: 0.023             | Peak 2: 0.000 | 0.0          | 0.000          |
| Intercept: 0.843       | Peak 3: 0.000 | 0.0          | 0.000          |
| Result quality : Good  |               |              |                |

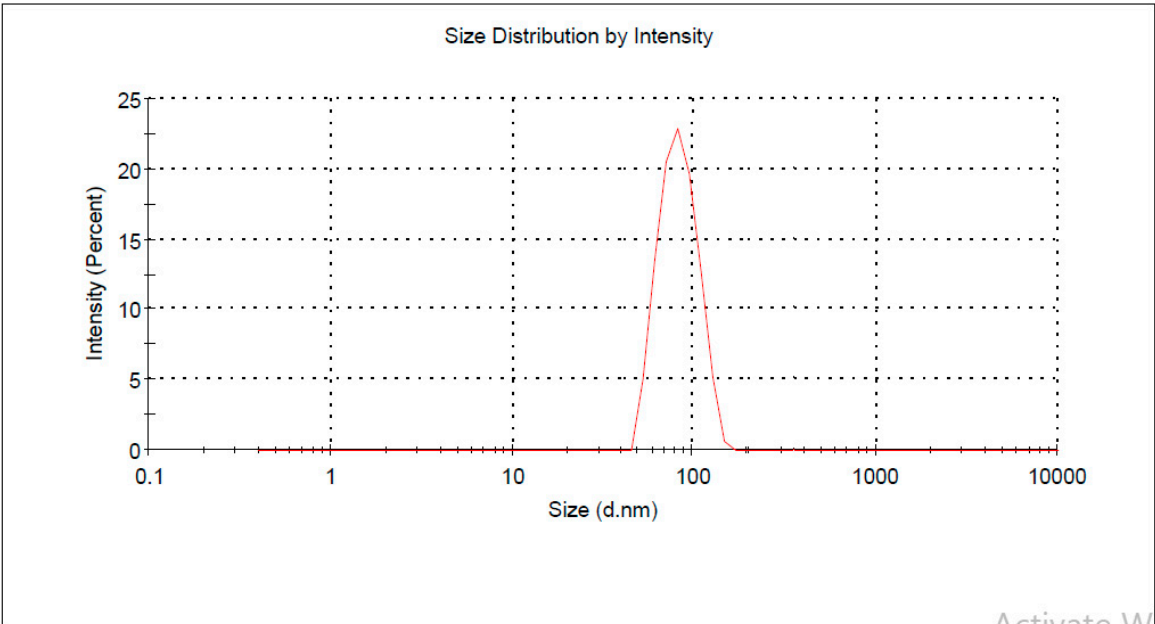

Figure S2: Size of micelles of LC-CMCS2

## Results

|                                                   | Mean (mV)            | Area (%) | St Dev (mV) |
|---------------------------------------------------|----------------------|----------|-------------|
| <b>Zeta Potential (mV): -29.0</b>                 | <b>Peak 1: -29.0</b> | 100.0    | 5.18        |
| <b>Zeta Deviation (mV): 5.18</b>                  | <b>Peak 2: 0.00</b>  | 0.0      | 0.00        |
| <b>Conductivity (mS/cm): 0.0159</b>               | <b>Peak 3: 0.00</b>  | 0.0      | 0.00        |
| <b>Result quality : See result quality report</b> |                      |          |             |

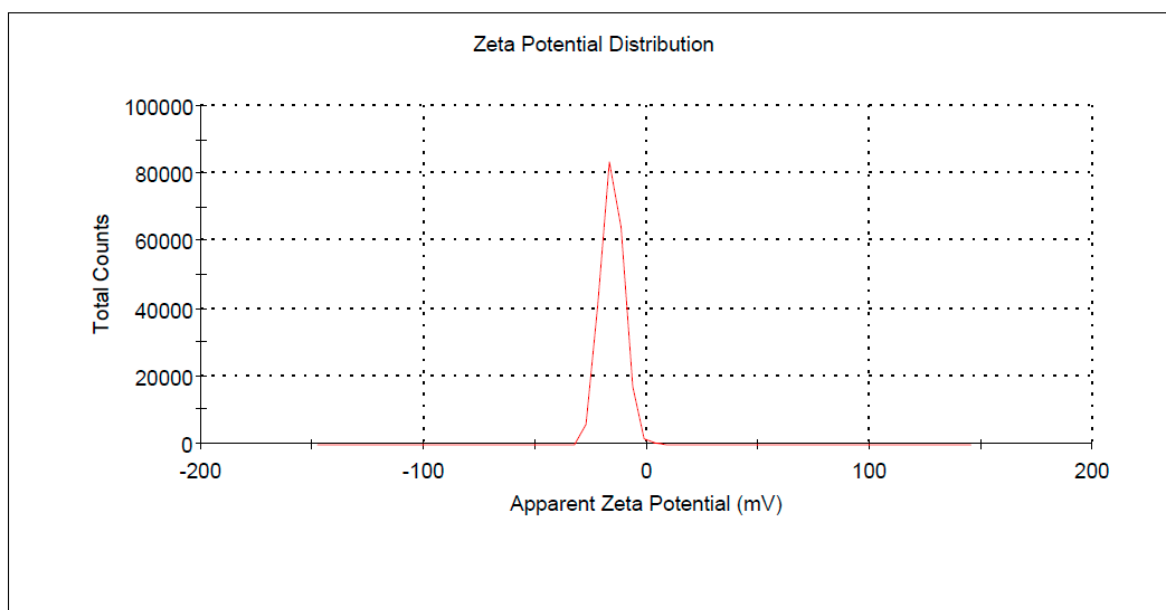

**Figure S3:** Surface charge of micelles of LC-CMCS2

### 1.3. Transmission electron microscopy (TEM)

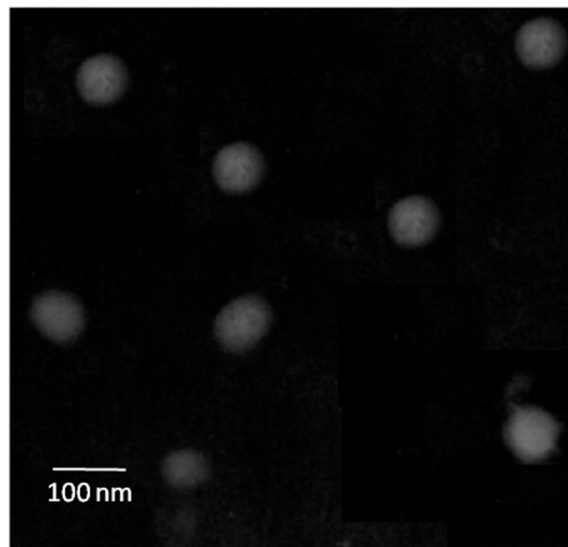

**Figure S4:** TEM image of LA-CMCS2 drug loaded micelles
